# Supplementary material
Source: Springer Nature journal article supplement (https://www.springermedizin.de/resource/supplementary/12887_2014_1206_MOESM9_ESM.pdf/9476674)
Supplement: MOESM9 [file 9476674]

|                                                           |                                                                                                                                                                                                                                                                                                                                                                                                                                                                                                                                              |                                                                                   |
|-----------------------------------------------------------|----------------------------------------------------------------------------------------------------------------------------------------------------------------------------------------------------------------------------------------------------------------------------------------------------------------------------------------------------------------------------------------------------------------------------------------------------------------------------------------------------------------------------------------------|-----------------------------------------------------------------------------------|
| <p><b>High confidence in qualitative evidence</b></p>     | <p>A review finding drawn from generally well-conducted studies with few methodological limitations and showing high levels of coherence</p>                                                                                                                                                                                                                                                                                                                                                                                                 |   |
| <p><b>Moderate confidence in qualitative evidence</b></p> | <p>A review finding where there are concerns regarding <i>either</i> the methodological limitations of the studies <i>or</i> the coherence of the review finding</p>                                                                                                                                                                                                                                                                                                                                                                         |  |
| <p><b>Low confidence in qualitative evidence</b></p>      | <p>A review finding based on studies with important methodological limitations <i>and</i> where there are concerns regarding the coherence of the review finding</p>                                                                                                                                                                                                                                                                                                                                                                         |  |
| <p><b>Coherence</b></p>                                   | <p><i>The extent to which a clear pattern can be identified across individual study data.</i> This pattern could include, for example:</p> <ul style="list-style-type: none"> <li>* circumstances where the review finding is consistent across multiple contexts <i>or</i></li> <li>* where the review finding incorporates explanations for any variations across individual studies</li> </ul> <p>Coherence may be further strengthened if the individual studies contributing to the finding are drawn from a wide range of settings</p> |                                                                                   |
